# Supplementary material for: Benchmarking large language models on the United States medical licensing examination for clinical reasoning and medical licensing scenarios
Source: Sci Rep. 2025 Dec 3;16:1387. doi: 10.1038/s41598-025-31010-4 (PMC12796295; doi:10.1038/s41598-025-31010-4)
Supplement: Supplementary file 4 — Supplementary Information 4. [file 41598_2025_31010_MOESM4_ESM.xlsx]

## Sheet: Step1
Question #	ChatGPT	DeepSeek	Grok	Qwen	Type
1	1	1	0	0	IT
2	1	1	1	1	T
3	1	0	1	1	TM
4	1	1	1	1	T
5	1	1	1	1	T
6	1	0	1	0	T
7	1	1	1	1	T
8	1	1	1	1	T
9	0	0	0	0	IT
10	1	1	0	0	T
11	1	1	1	1	T
12	0	1	0	0	T
13	1	1	0	0	T
14	0	1	1	1	T
15	1	0	0	0	T
16	1	1	0	1	TM
17	1	1	1	1	T
18	1	1	0	1	IT
19	1	1	1	1	T
20	1	1	0	1	T
21	0	0	1	0	ITM
22	1	1	1	0	T
23	1	1	1	1	T
24	1	1	1	0	T
25	0	1	1	1	T
26	1	1	1	1	T
27	1	1	1	1	IT
28	1	1	1	1	T
29	1	1	0	1	T
30	1	1	1	1	T
31	1	1	1	1	T
32	1	1	1	0	T
33	1	0	1	0	TM
34	1	1	1	1	IT
35	1	1	1	1	T
36	1	1	1	1	T
37	1	1	1	1	T
38	1	1	1	1	T
39	1	0	1	1	T
40	0	0	0	0	IT
41	1	1	1	1	T
42	1	1	1	1	T
43	1	1	1	1	T
44	1	0	0	0	IT
45	1	1	1	1	T
46	1	1	1	1	T
47	1	1	1	1	T
48	1	1	1	1	T
49	0	1	1	1	T
50	1	1	0	0	T
51	1	1	1	1	T
52	1	1	1	1	T
53	1	1	1	1	IT
54	1	1	0	1	T
55	1	0	0	0	T
56	1	1	0	0	T
57	1	1	1	1	T
58	1	1	1	1	T
59	0	1	1	1	IT
60	1	1	1	1	T
61	0	1	1	1	T
62	1	1	1	1	TM
63	1	1	1	1	IT
64	1	1	0	1	T
65	1	1	1	0	IT
66	1	1	1	0	T
67	1	1	0	0	T
68	0	1	1	1	ITM
69	1	1	1	1	T
70	1	1	1	1	IT
71	1	1	1	1	T
72	1	1	0	0	IT
73	1	1	1	1	T
74	1	1	0	1	T
75	1	1	0	1	T
76	1	1	1	1	T
77	1	1	1	1	T
78	0	1	0	0	T
79	1	1	1	0	IT
80	1	1	1	1	T
81	1	1	1	1	T
82	1	1	1	1	T
83	0	1	1	1	T
84	1	1	1	1	T
85	1	1	1	1	T
86	0	1	1	1	T
87	1	1	1	1	T
88	1	1	0	1	IT
89	1	1	1	1	T
90	1	1	1	1	T
91	1	1	1	1	T
92	0	0	1	1	IT
93	1	1	1	0	T
94	1	1	1	1	T
95	1	1	1	0	T
96	1	1	1	1	IT
97	1	1	1	1	T
98	1	1	1	0	T
99	1	0	0	0	T
100	1	1	1	1	T
101	1	1	0	0	T
102	1	1	0	1	IT
103	0	1	0	0	T
104	1	1	1	0	T
105	1	1	1	1	T
106	1	1	0	1	T
107	0	1	1	0	T
108	1	1	1	1	T
109	1	1	1	1	T
110	1	1	1	1	T
111	1	1	1	1	T
112	1	1	1	1	T
113	1	1	1	1	T
114	1	1	1	0	T
115	1	0	0	0	IT
116	1	1	1	0	T
117	1	1	1	1	T
118	1	1	1	0	T
119	1	1	1	1	TM
	103	106	90	84		Total
Correct	0.86554	0.89075	0.7563	0.70588
Incorrect	0.1345	0.1092	0.2437	0.2941

## Sheet: Step2
Question #	ChatGPT	DeepSeek	Grok	Qwen	Type
1	1	1	1	1	T
2	1	1	1	0	T
3	1	1	1	1	T
4	0	1	1	0	T
5	1	1	0	1	T
6	1	1	1	1	IT
7	0	1	1	1	T
8	1	1	1	1	T
9	1	1	1	1	T
10	1	1	0	1	T
11	1	1	1	0	T
12	1	1	1	1	T
13	1	1	1	1	T
14	1	1	1	0	T
15	1	1	1	1	T
16	1	1	1	1	T
17	0	0	0	1	TM
18	1	1	0	1	T
19	1	1	1	1	T
20	1	1	1	0	T
21	0	1	0	1	IT
22	1	1	1	1	T
23	1	1	1	1	T
24	1	1	1	1	T
25	1	1	1	1	IT
26	1	1	1	1	T
27	1	1	1	1	T
28	1	1	1	1	T
29	0	1	1	1	TM
30	1	1	1	1	T
31	1	1	1	1	T
32	0	1	1	0	T
33	1	1	1	1	T
34	1	1	1	1	T
35	1	1	1	1	T
36	1	1	1	1	T
37	0	1	1	1	T
38	1	1	1	1	T
39	1	1	1	1	T
40	1	1	1	1	T
41	0	1	0	0	T
42	1	1	1	1	T
43	1	1	1	1	T
44	1	0	1	0	IT
45	1	1	1	1	T
46	1	1	1	0	T
47	1	1	1	1	T
48	1	0	1	0	T
49	0	1	0	1	T
50	1	0	1	0	T
51	1	1	1	1	T
52	1	1	1	1	IT
53	1	1	0	1	IT
54	0	1	1	1	IT
55	1	1	1	1	TM
56	1	1	1	1	T
57	1	1	0	1	IT
58	1	1	0	1	T
59	1	1	1	1	T
60	1	1	1	1	T
61	1	1	1	1	T
62	1	1	1	1	T
63	1	1	1	1	T
64	1	0	0	1	T
65	1	1	1	1	T
66	1	1	0	1	T
67	0	1	1	0	T
68	0	1	1	0	T
69	1	1	1	1	IT
70	1	1	1	1	T
71	1	1	1	1	T
72	1	1	1	1	IT
73	1	1	1	1	T
74	1	1	0	0	T
75	1	1	0	1	T
76	1	1	1	1	T
77	1	1	0	1	T
78	1	1	1	1	T
79	1	1	1	1	T
80	1	1	1	1	T
81	1	1	0	1	T
82	1	1	1	1	T
83	1	1	1	1	T
84	1	1	1	0	IT
85	1	1	1	1	T
86	1	1	1	1	T
87	1	1	1	1	T
88	0	1	0	1	T
89	0	0	1	0	TM
90	1	1	1	1	T
91	0	1	1	1	TM
92	1	1	0	0	T
93	1	1	1	1	T
94	1	1	0	1	T
95	1	1	0	0	T
96	0	1	0	0	T
97	0	1	1	1	T
98	1	1	1	1	T
99	1	1	1	1	T
100	1	1	1	0	IT
101	1	1	0	1	T
102	1	0	0	0	IT
103	1	1	0	1	TM
104	1	1	1	1	TM
105	1	1	1	0	T
106	1	1	1	1	T
107	1	1	1	1	T
108	1	0	0	0	T
109	1	1	1	1	T
110	1	1	1	1	T
111	1	1	1	0	T
112	1	1	1	1	TM
113	1	1	0	1	T
114	1	1	1	0	T
115	1	1	0	0	T
116	1	1	1	1	T
117	1	1	1	1	IT
118	1	1	1	1	T
119	0	1	1	1	T
120	1	1	1	1	T
	102	112	93	94		Total
Correct	0.85	0.93333	0.775	0.7833
Incorrect	0.15	0.0766	0.225	0.2137

## Sheet: Step3
Question #	ChatGPT	DeepSeek	Grok	Qwen	Type
1	0	1	1	0	T
2	1	1	1	1	T
3	0	1	1	1	T
4	1	0	0	1	T
5	1	1	1	1	T
6	1	1	1	1	IT
7	0	1	1	1	T
8	1	1	0	0	T
9	1	0	1	1	T
10	1	0	1	1	T
11	1	1	1	1	T
12	0	1	1	0	TM
13	1	1	1	1	TM
14	1	1	1	1	TM
15	1	1	1	1	TM
16	1	1	1	1	T
17	1	1	1	1	T
18	1	1	1	1	T
19	1	1	1	1	T
20	1	1	1	1	T
21	1	1	1	1	TM
22	1	1	1	1	T
23	0	1	1	1	T
24	1	1	1	1	ITM
25	1	0	0	0	T
26	1	1	1	0	T
27	1	1	0	1	T
28	1	1	1	1	T
29	1	1	1	1	T
30	1	1	1	1	T
31	1	1	1	1	T
32	1	1	1	1	T
33	1	1	1	1	T
34	1	1	1	1	T
35	1	0	0	0	T
36	1	1	1	1	T
37	1	0	0	1	ITM
38	1	1	0	1	T
39	1	1	1	0	T
40	1	1	1	1	IT
41	1	1	1	0	T
42	1	1	0	1	T
43	1	1	1	1	T
44	1	1	1	1	T
45	1	1	0	1	IT
46	1	1	1	1	T
47	1	1	1	0	T
48	0	1	1	1	T
49	1	0	0	1	TM
50	1	1	1	1	TM
51	0	1	1	1	T
52	1	0	1	1	T
53	0	0	0	0	T
54	0	0	0	0	IT
55	1	1	1	1	TM
56	1	1	1	1	TM
57	1	1	1	1	T
58	0	1	1	1	IT
59	1	1	1	0	T
60	1	0	0	1	T
61	1	1	0	0	T
62	1	1	1	1	T
63	1	1	0	1	T
64	1	1	0	1	ITM
65	1	1	1	1	T
66	1	1	1	1	T
67	1	1	0	0	T
68	1	1	0	1	T
69	1	1	0	0	IT
70	1	1	1	1	ITM
71	1	1	1	1	T
72	1	1	1	1	T
73	1	1	1	1	T
74	0	1	1	0	T
75	1	1	1	0	T
76	1	1	0	0	T
77	1	1	1	1	T
78	1	1	1	1	T
79	0	1	1	1	T
80	1	1	1	1	T
81	1	1	1	1	T
82	1	1	1	1	T
83	0	0	0	1	T
84	1	1	1	1	T
85	1	1	0	0	T
86	1	1	1	1	T
87	1	1	1	1	T
88	1	1	1	1	T
89	1	1	0	0	TM
90	1	1	1	1	TM
91	1	1	0	0	TM
92	1	1	1	1	T
93	0	0	0	0	IT
94	1	1	1	1	T
95	0	1	1	0	T
96	1	1	1	0	T
97	0	1	0	1	T
98	0	1	1	1	T
99	1	1	0	1	IT
100	1	1	1	0	T
101	0	1	1	0	T
102	1	1	0	1	T
103	1	1	1	1	T
104	1	0	1	1	T
105	1	1	1	1	T
106	1	1	1	0	T
107	1	0	0	0	IT
108	0	0	0	1	T
109	1	1	1	0	T
110	1	1	1	1	T
111	0	0	0	0	IT
112	1	1	1	1	T
113	1	1	1	1	T
114	0	0	1	0	T
115	1	1	1	1	T
116	0	0	0	0	TM
117	0	1	1	0	T
118	1	1	1	1	T
119	1	1	0	0	T
120	1	1	1	1	T
121	1	1	1	1	T
122	1	1	1	1	T
123	0	0	1	1	TM
124	1	1	0	1	T
125	0	1	1	0	T
126	1	1	1	1	T
127	1	1	1	1	T
128	0	1	1	1	T
129	1	0	1	0	T
130	1	1	1	1	T
131	1	1	1	1	IT
132	0	1	0	1	T
133	1	1	1	1	T
134	1	1	1	1	T
135	1	1	0	0	T
136	1	0	0	1	IT
137	0	1	1	0	T
	109	115	100	99
Correct	0.79562	0.83941	0.72992	0.72262
Incorrect	0.2044	0.1606	0.2701	0.2734
